# Supplementary material for: Comparative performance of scFv-based anti-BCMA CAR formats for improved T cell therapy in multiple myeloma
Source: PubMed Central journal article supplement (PMC11024081; doi:10.1007/s00262-024-03688-4), 2024-04-17
Supplement: 262_2024_3688_MOESM1_ESM.pdf [file 262_2024_3688_MOESM1_ESM.pdf]

# 1 SUPPLEMENTARY FIGURES

A

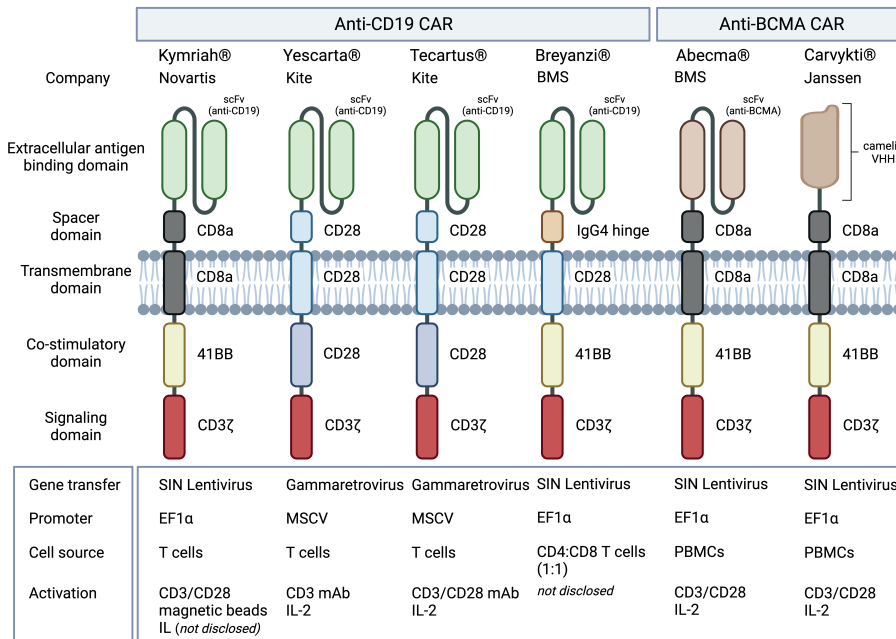

B

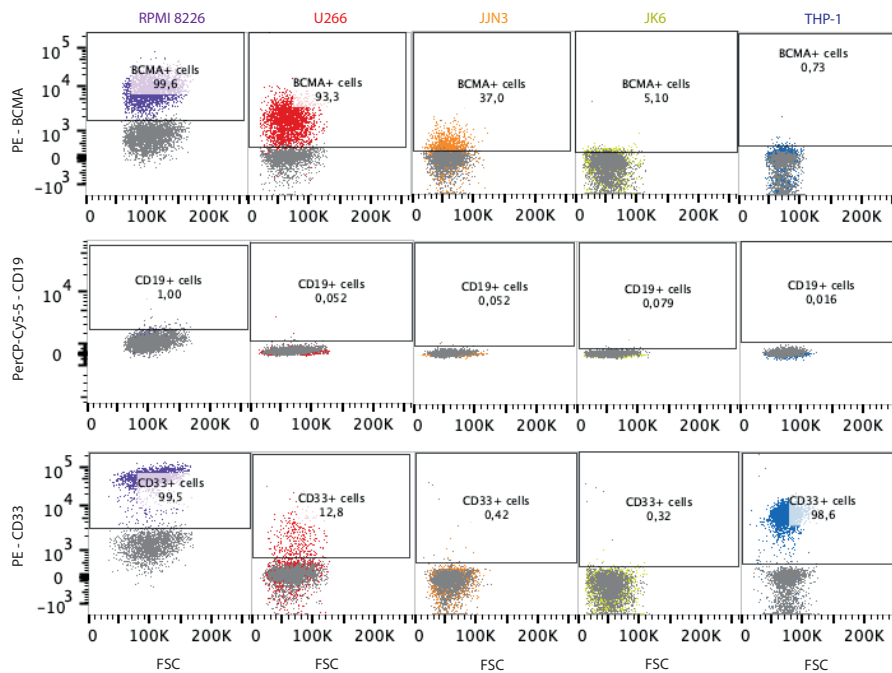

2

3 **Suppl. Figure 1. FDA-approved CAR T cell products and surface marker expression on target cell lines.**

4 A Overview about the currently FDA-approved anti-CD19 and anti-BCMA CAR T cell products. B Expression  
5 of BCMA, CD19 and CD33 was detected on multiple myeloma cells (RPMI 8226, U266, JLN3, JK6) and on the  
6 AML cell line THP-1 and compared to isotype controls by flow cytometry.

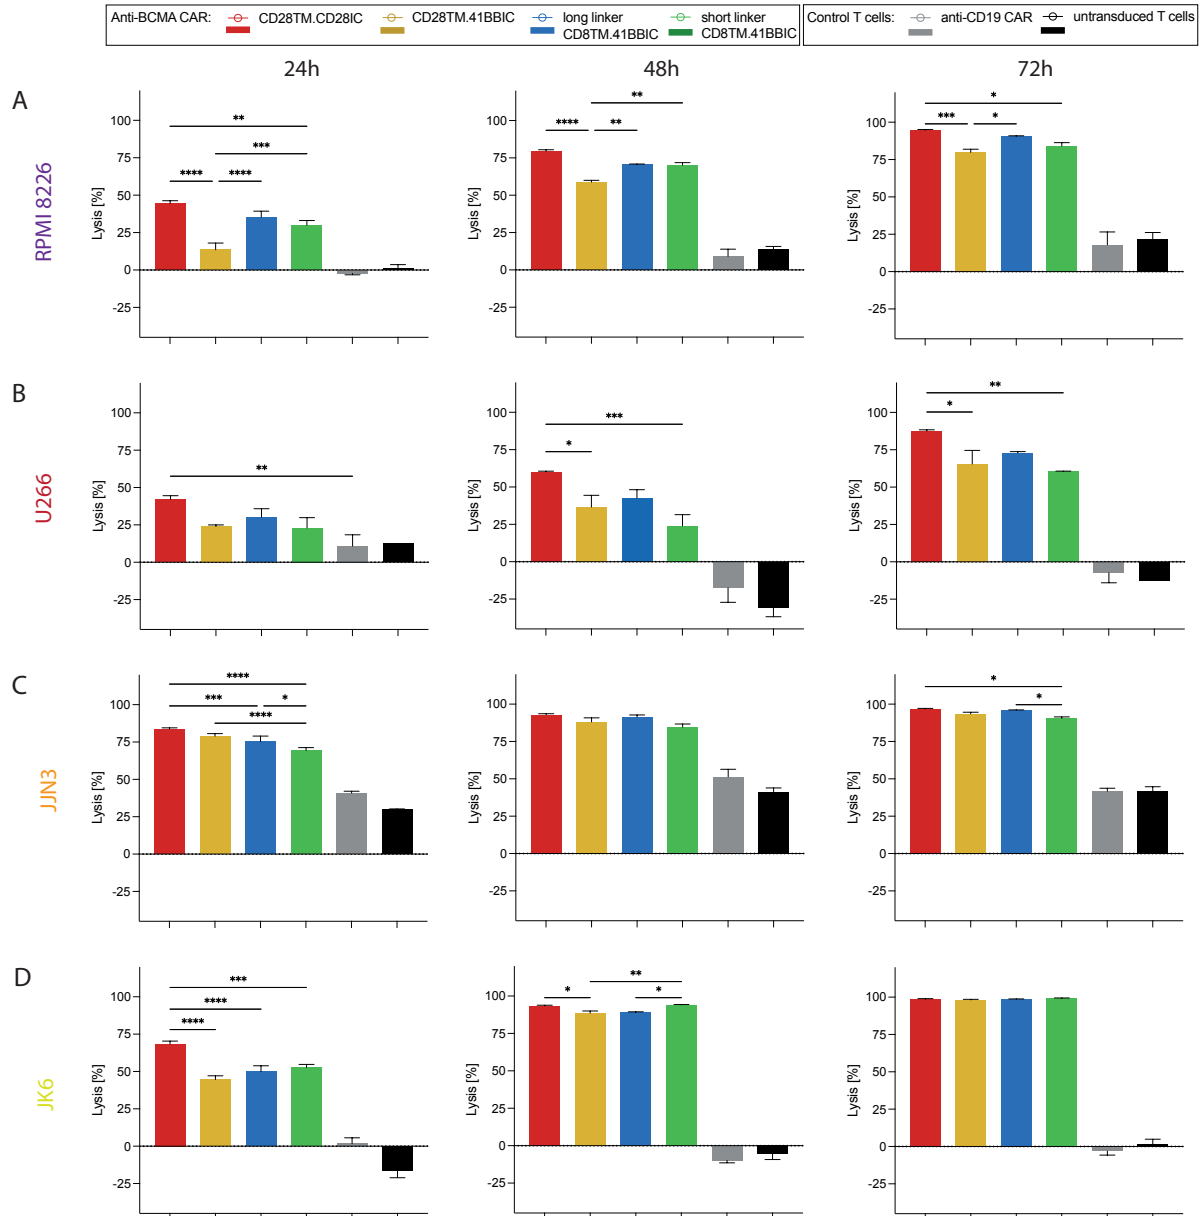

**Suppl. Figure 2. Highest cytotoxic capacity with CD28TM.CD28IC-based anti-BCMA CAR T cells.**

**A-D** Anti-BCMA CAR T cells (CD28TM.CD28IC: red; CD28TM.41BBIC: yellow; long linker CD8TM.41BBIC: blue; short linker CD8TM.41BBIC: green) were co-cultured with **A** RPMI 8226, **B** U266, **C** JN3 or **D** JK6 tumor cell lines for 24 h, 48 h, and 72 h at an indicated E:T ratio of 0.25:1. Anti-CD19 CAR T cells (gray) and untransduced T cells (black) were used as negative controls, respectively. Cell lysis was quantified by luciferase-based killing assay. Subfigures show data of one representative donor out of three independent experiments. Each experiment was performed in duplicates or triplicates. Values in all graphs represent means ± SEM (\* p < 0.05, \*\* p < 0.01, \*\*\* p < 0.001, \*\*\*\* p < 0.0001). Only p-values for comparison of different anti-BCMA CAR constructs were shown except U266 24 h. Statistical comparison was performed by a 2-way ANOVA with Bonferroni multiple comparison correction.

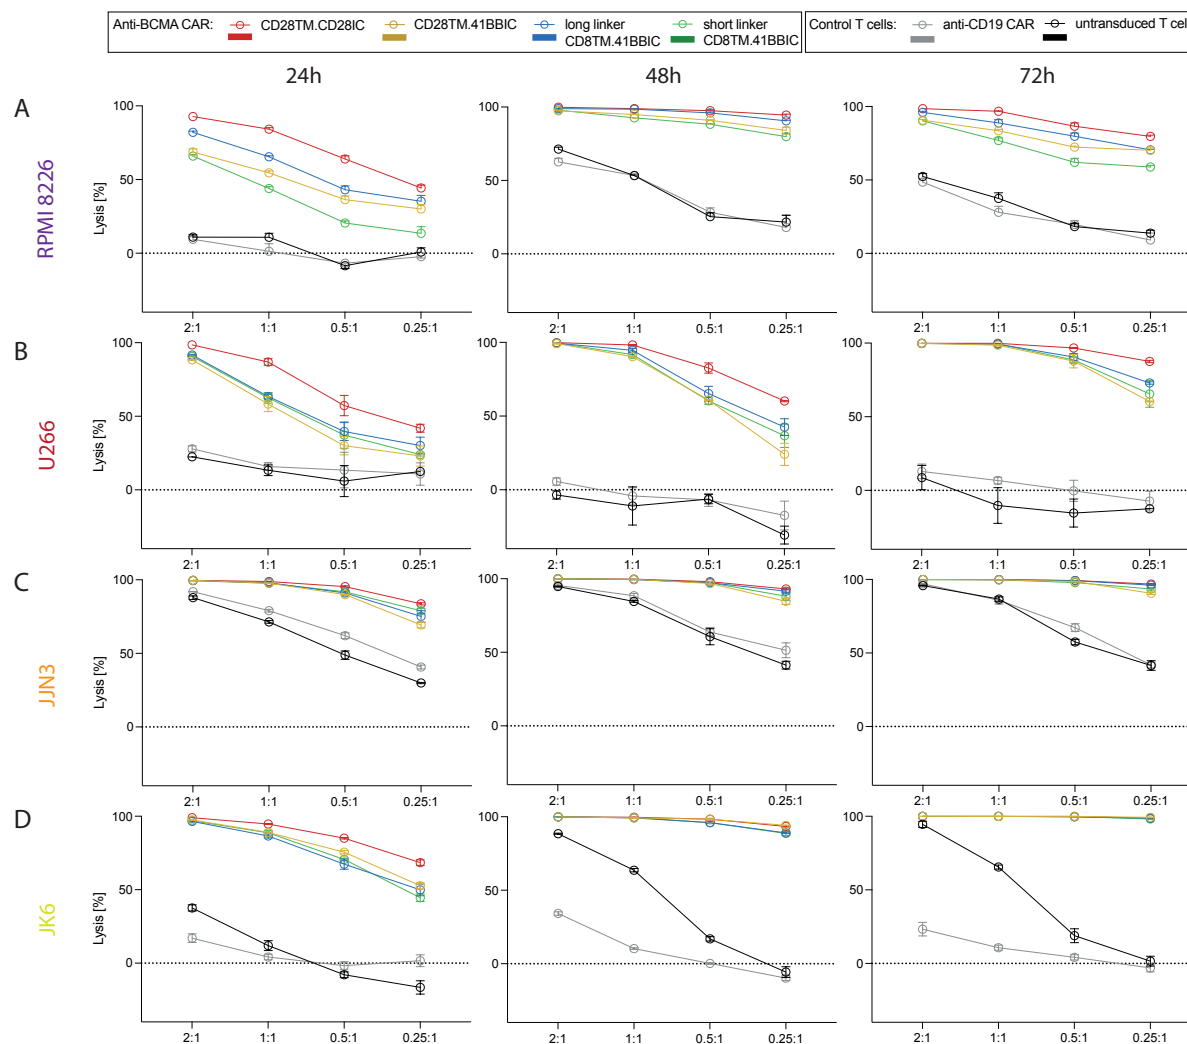

18  
 19 **Suppl. Figure 3. Highest cytotoxic capacity with CD28TM.CD28IC-based anti-BCMA CAR T cells.**  
 20 **A-D** Anti-BCMA CAR T cells (CD28TM.CD28IC: red; CD28TM.41BBIC: yellow; long linker CD8TM.41BBIC:  
 21 blue; short linker CD8TM.41BBIC: green) were co-cultured with **A** RPMI 8226, **B** U266, **C** JLN3 or **D** JK6 tumor  
 22 cell lines for 24 h, 48 h, and 72 h at indicated E:T ratios of 2:1, 1:1, 0.5:1 and 0.25:1. Anti-CD19 CAR T cells  
 23 (gray) and untransduced T cells (black) were used as negative controls, respectively. Cell lysis was quantified by  
 24 luciferase-based killing assay. Subfigures show data of one representative donor out of three independent  
 25 experiments. Each experiment was performed in triplicates. The p-values are not integrated due to clarity of the  
 26 figure.

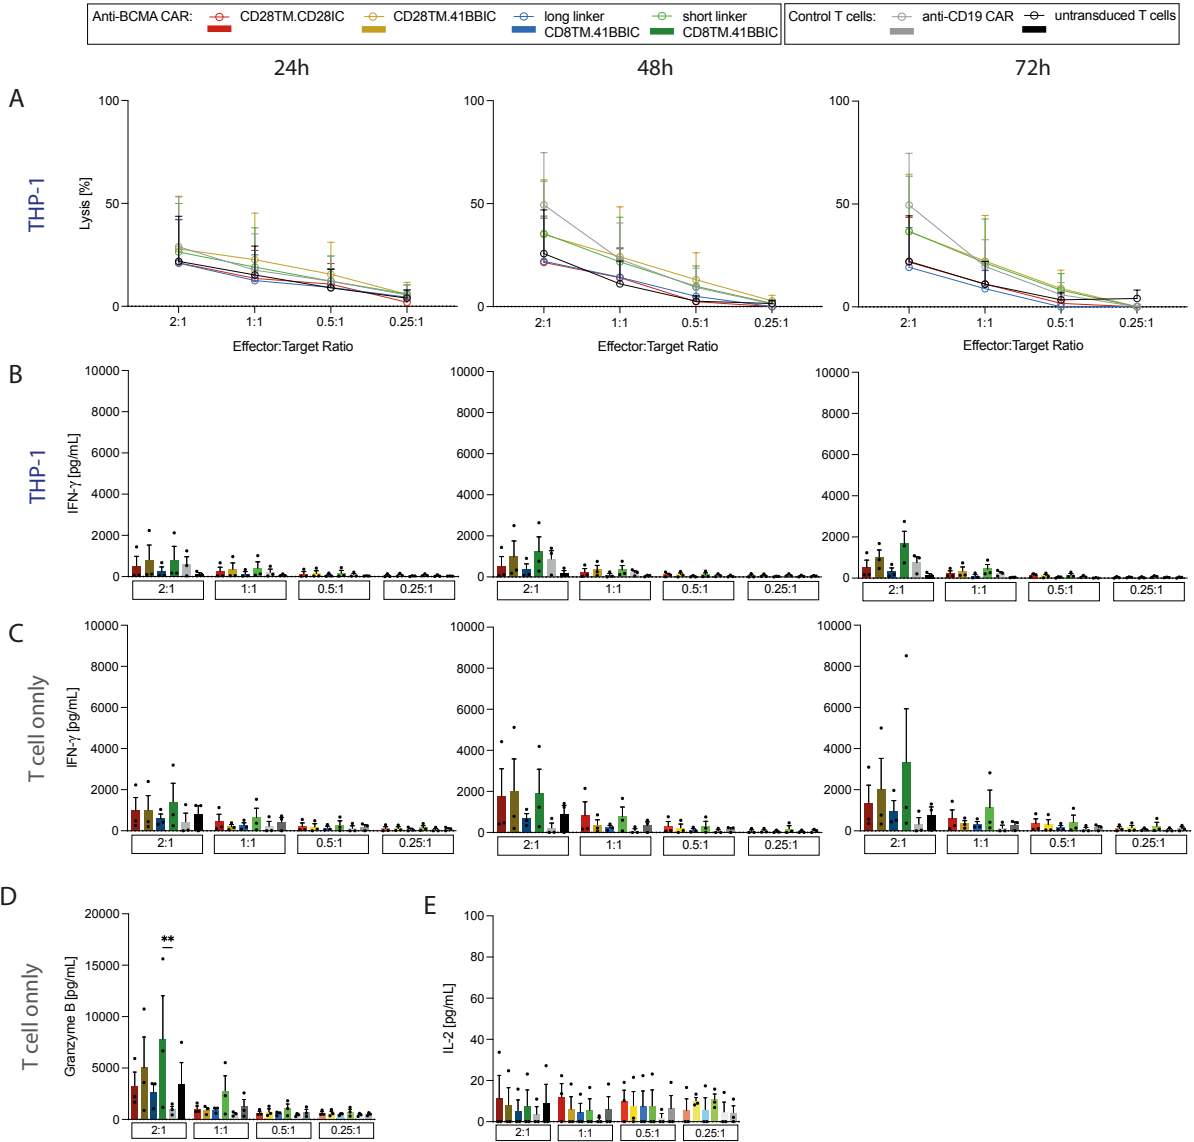

27  
28  
29  
30  
31  
32  
33  
34  
35  
36  
37  
38  
39  
40

**Suppl. Figure 4. Anti-BCMA CAR T cell functionality is specific for BCMA.**

A Anti-BCMA CAR T cells (CD28TM.CD28IC: red; CD28TM.41BBIC: yellow; long linker CD8TM.41BBIC: blue; short linker CD8TM.41BBIC: green) were co-cultured with BCMA-negative THP-1 tumor cells for 24 h, 48 h, and 72 h at the indicated E:T ratios. Anti-CD19 CAR T cells (gray) and untransduced T cells (black) were used as controls, respectively. Cell lysis was quantified by BLI. Subfigures show pooled data of three different donors (n=3). **B-C** IFN- $\gamma$  ELISA with 24 h, 48 h, and 72 h co-culture supernatants, **D** Granzyme B and **E** IL-2 ELISA with 72 h co-culture supernatants of anti-BCMA CAR T cells (CD28TM.CD28IC: red; CD28TM.41BBIC: yellow; long linker CD8TM.41BBIC: blue; short linker CD8TM.41BBIC: green), anti-CD19 CAR T cells (gray) and untransduced T cells (black) with **B** THP-1 or **C-E** without tumor cells for three independent donors (n=3). Each experiment was performed in triplicates. Values in all graphs represent means  $\pm$  SEM (\* p < 0.05, \*\* p < 0.01, \*\*\* p < 0.001, \*\*\*\* p < 0.0001). Only selected p-values are shown. Statistical comparison was performed by a 2-way ANOVA with Bonferroni multiple comparison correction.

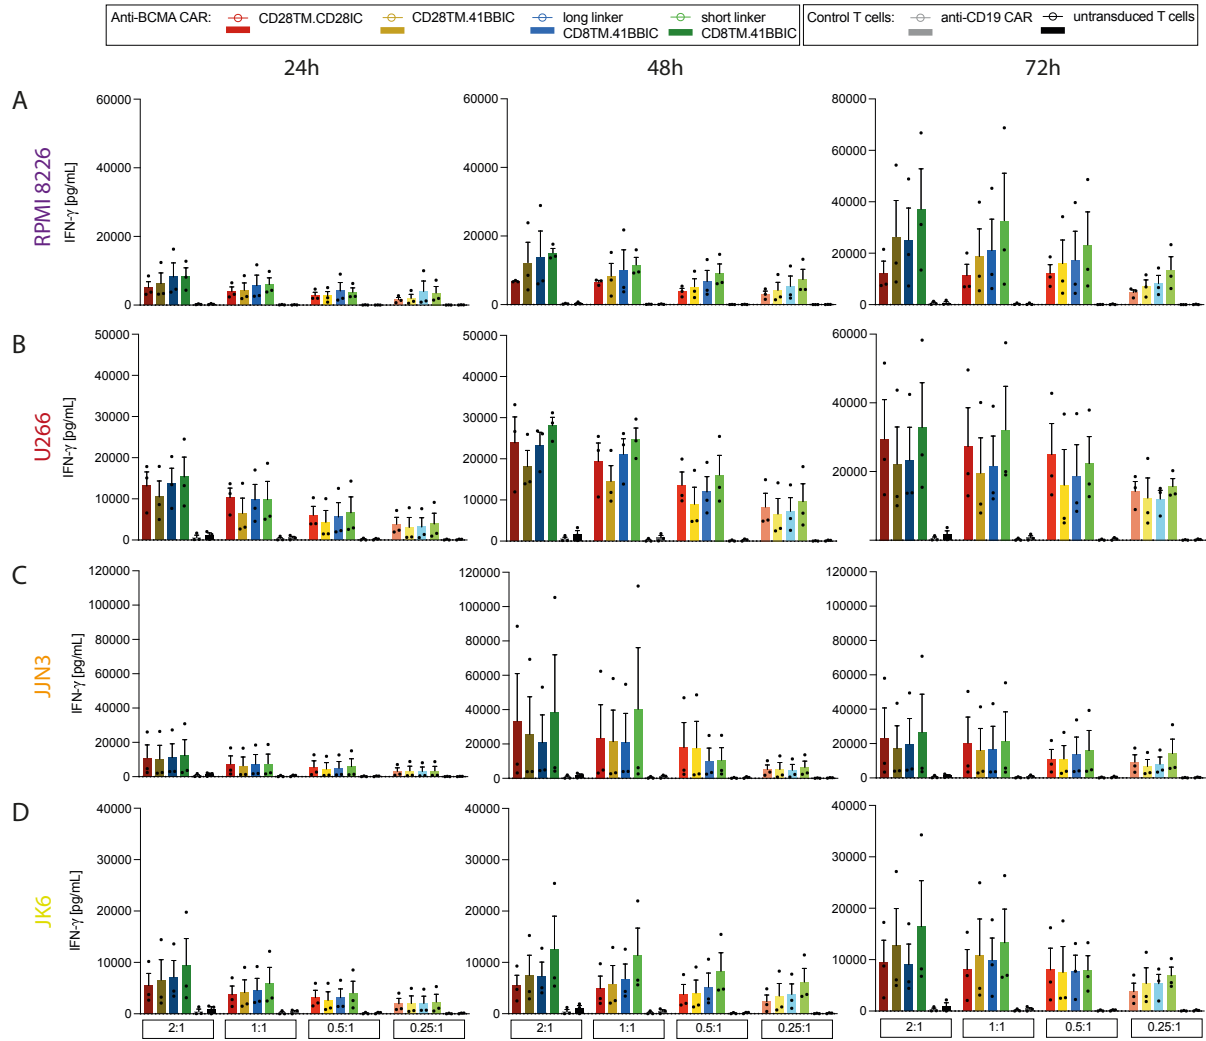

41  
 42 **Suppl. Figure 5. Highest IFN- $\gamma$  production with short linker CD8TM.41BBIC-based anti-BCMA CAR.**  
 43 **A-D** IFN- $\gamma$  ELISA with 24 h, 48 h, and 72 h co-culture supernatants of anti-BCMA CAR T cells  
 44 (CD28TM.CD28IC: red; CD28TM.41BBIC: yellow; long linker CD8TM.41BBIC: blue; short linker  
 45 CD8TM.41BBIC: green), anti-CD19 CAR T cells (gray) and untransduced T cells (black) with **A** RPMI 8226, **B**  
 46 U266, **C** JLN3, or **D** JK6, for three independent donors (n=3). Each experiment was performed in triplicates. Values  
 47 in all graphs represent means  $\pm$  SEM (\* p < 0.05, \*\* p < 0.01, \*\*\* p < 0.001, \*\*\*\* p < 0.0001). Only p-values for  
 48 comparison of different anti-BCMA CAR constructs were shown. Statistical comparison was performed by a 2-  
 49 way ANOVA with Bonferroni multiple comparison correction.

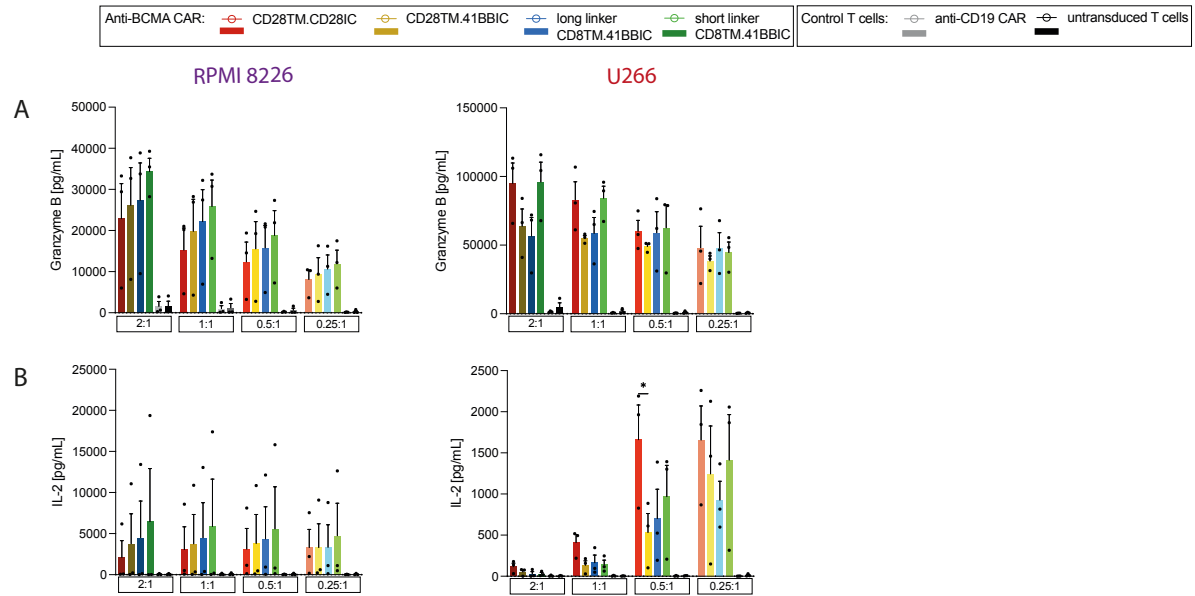

50  
51  
52  
53  
54  
55  
56  
57  
58

**Suppl. Figure 6. Highest Granzyme B production with short linker CD8TM.41BBIC anti-BCMA CAR.**

**A** Granzyme B and **B** IL-2 ELISA with 72 h co-culture supernatants of anti-BCMA CAR T cells (CD28TM.CD28IC: red; CD28TM.41BBIC: yellow; long linker CD8TM.41BBIC: blue; short linker CD8TM.41BBIC: green), anti-CD19 CAR T cells (gray) and untransduced T cells (black) with RPMI 8226 and U266 for three independent donors (n=3). Each experiment was performed in triplicates. Values in all graphs represent means  $\pm$  SEM (\* p < 0.05, \*\* p < 0.01, \*\*\* p < 0.001, \*\*\*\* p < 0.0001). Only selected p-values are shown. Statistical comparison was performed by a 2-way ANOVA with Bonferroni multiple comparison correction.
